# Supplementary material
Source: publisher site journal article supplement (https://www.dovepress.com/get_supplementary_file.php?f=505443.docx)

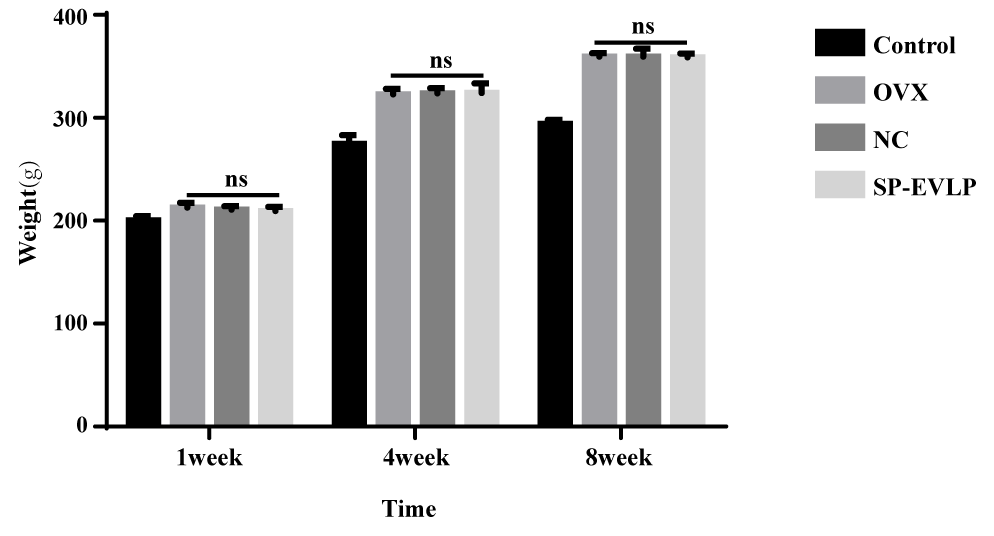


Supplementary figure 1: Records of body weight of rat in different groups

Supplement: Supplementary file 1 [file get_supplementary_file.php]
